# Supplementary material for: Birth Weight, Body Silhouette Over the Life Course, and Incident Diabetes in 91,453 Middle-Aged Women From the French Etude Epidemiologique de Femmes de la Mutuelle Générale de l'Education Nationale (E3N) Cohort
Source: PubMed Central journal article supplement — Diabetes Care. 2009 Nov 16;33(2):298–303. doi: 10.2337/dc09-1304 (PMC2809270; doi:10.2337/dc09-1304), 2009-11-16
Supplement: supp_dc09-1304_dc09-1304_Online_Appendix.pdf [file supp_dc09-1304_dc09-1304_Online_Appendix.pdf]

**Online Appendix Figure 1.** Body Silhouettes used in baseline questionnaire (as first proposed by Sørensen et al, 1983).

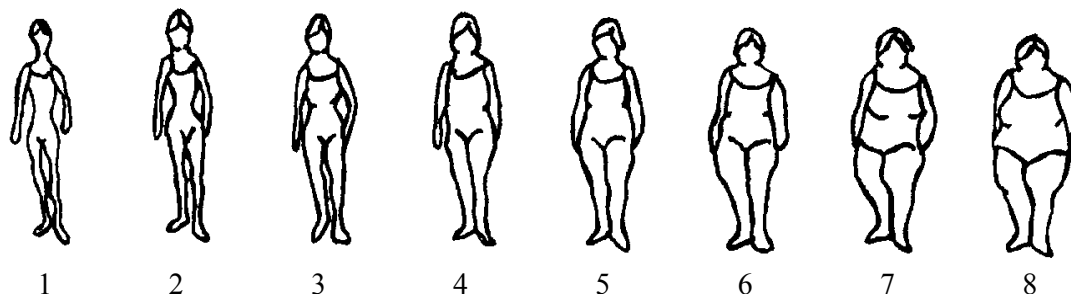

The silhouettes are represented by drawings of figures which are ranked from 1 to 8, corresponding to increasing body size (from the leanest to the largest). Women reported the drawing that reflected their perceived body size at specific ages (at approximately age 8 years, at menarche, at age 20–25 years, at age 35–40 years, and at the time of completion of the questionnaire).

**Online Appendix Table 1.** Hazards ratio [95% CI] for incident diabetes in relation to body silhouette history in the E3N cohort (1990-2007, n=91,453) according to baseline overweight.

|                         | BMI < 25<br>kg/m <sup>2</sup> at<br>baseline<br>Cases / total<br>person-years | Model 2*                    | Model 3†                    | BMI ≥ 25<br>kg/m <sup>2</sup> at<br>baseline<br>Cases / total<br>person-years | Model 2*                    | Model 3†                    |
|-------------------------|-------------------------------------------------------------------------------|-----------------------------|-----------------------------|-------------------------------------------------------------------------------|-----------------------------|-----------------------------|
| <b>Birth weight</b>     |                                                                               |                             |                             |                                                                               |                             |                             |
| - Low                   | 98 / 91,222                                                                   | 1.29 [1.02 - 1.62]          | 1.31 [1.04 - 1.65]          | 144 / 15,362                                                                  | 1.38 [1.13 - 1.68]          | 1.41 [1.16 - 1.72]          |
| - Medium                | 631 / 806,447                                                                 | 1                           | 1                           | 838 / 139,445                                                                 | 1                           | 1                           |
| - High                  | 56 / 94,407                                                                   | 0.76 [0.58 - 0.99]          | 0.71 [0.54 - 0.94]          | 104 / 23,626                                                                  | 0.70 [0.57 - 0.86]          | 0.66 [0.54 - 0.81]          |
| - Missing               | 229 / 165,899                                                                 | 1.23 [0.97 - 1.57]          | 1.28 [1.01 - 1.63]          | 434 / 44,902                                                                  | 1.13 [0.92 - 1.38]          | 1.12 [0.91 - 1.38]          |
|                         |                                                                               | P <sub>trend</sub> = 0.0008 | P <sub>trend</sub> = 0.0002 |                                                                               | P <sub>trend</sub> < 0.0001 | P <sub>trend</sub> < 0.0001 |
| <b>Body silhouette</b>  |                                                                               |                             |                             |                                                                               |                             |                             |
| <b>- at 8 years</b>     |                                                                               |                             |                             |                                                                               |                             |                             |
| 1                       | 669 / 615,982                                                                 | 1.89 [1.49 - 2.40]          | 2.04 [1.61 - 2.60]          | 771 / 95,459                                                                  | 1.54 [1.31 - 1.81]          | 1.66 [1.41 - 1.95]          |
| 2                       | 156 / 232,916                                                                 | 1.27 [0.96 - 1.67]          | 1.32 [1.00 - 1.74]          | 267 / 43,374                                                                  | 1.24 [1.03 - 1.50]          | 1.31 [1.08 - 1.58]          |
| 3                       | 75 / 141,760                                                                  | 1                           | 1                           | 185 / 37,160                                                                  | 1                           | 1                           |
| ≥ 4                     | 59 / 109,817                                                                  | 0.97 [0.69 - 1.36]          | 0.91 [0.65 - 1.28]          | 196 / 34,439                                                                  | 1.15 [0.94 - 1.40]          | 1.11 [0.91 - 1.36]          |
| Missing                 | 55 / 57,501                                                                   | 1.48 [1.04 - 2.10]          | 1.55 [1.09 - 2.20]          | 101 / 12,904                                                                  | 1.41 [1.10 - 1.80]          | 1.50 [1.17 - 1.92]          |
|                         |                                                                               | P <sub>trend</sub> < 0.0001 | P <sub>trend</sub> < 0.0001 |                                                                               | P <sub>trend</sub> < 0.0001 | P <sub>trend</sub> < 0.0001 |
| <b>- at puberty</b>     |                                                                               |                             |                             |                                                                               |                             |                             |
| 1                       | 315 / 266,020                                                                 | 1.44 [1.20 - 1.72]          | 1.60 [1.33 - 1.91]          | 284 / 29,989                                                                  | 1.53 [1.31 - 1.80]          | 1.70 [1.45 - 2.00]          |
| 2                       | 350 / 366,606                                                                 | 1.21 [1.02 - 1.44]          | 1.27 [1.07 - 1.51]          | 458 / 63,558                                                                  | 1.22 [1.06 - 1.40]          | 1.29 [1.12 - 1.48]          |
| 3                       | 199 / 260,272                                                                 | 1                           | 1                           | 346 / 60,115                                                                  | 1                           | 1                           |
| ≥ 4                     | 109 / 225,759                                                                 | 0.62 [0.49 - 0.79]          | 0.58 [0.46 - 0.74]          | 340 / 59,849                                                                  | 0.98 [0.84 - 1.14]          | 0.92 [0.79 - 1.07]          |
| Missing                 | 41 / 39,318                                                                   | 1.07 [0.76 - 1.50]          | 1.07 [0.76 - 1.50]          | 92 / 9,824                                                                    | 1.44 [1.14 - 1.82]          | 1.46 [1.15 - 1.84]          |
|                         |                                                                               | P <sub>trend</sub> < 0.0001 | P <sub>trend</sub> < 0.0001 |                                                                               | P <sub>trend</sub> < 0.0001 | P <sub>trend</sub> < 0.0001 |
| <b>- at 20-25 years</b> |                                                                               |                             |                             |                                                                               |                             |                             |
| 1                       | 148 / 129,329                                                                 | 1.28 [1.05 - 1.56]          | 1.61 [1.32 - 1.96]          | 102 / 9,734                                                                   | 1.56 [1.26 - 1.93]          | 1.75 [1.41 - 2.16]          |
| 2                       | 453 / 506,214                                                                 | 1.04 [0.90 - 1.21]          | 1.19 [1.03 - 1.38]          | 441 / 58,688                                                                  | 1.24 [1.09 - 1.41]          | 1.33 [1.17 - 1.51]          |
| 3                       | 303 / 365,299                                                                 | 1                           | 1                           | 537 / 89,638                                                                  | 1                           | 1                           |
| ≥ 4                     | 79 / 129,580                                                                  | 0.70 [0.54 - 0.89]          | 0.61 [0.48 - 0.79]          | 375 / 59,085                                                                  | 1.05 [0.92 - 1.20]          | 0.90 [0.79 - 1.03]          |
| Missing                 | 31 / 27,555                                                                   | 1.00 [0.69 - 1.46]          | 0.97 [0.67 - 1.41]          | 65 / 6,191                                                                    | 1.53 [1.18 - 2.00]          | 1.49 [1.15 - 1.95]          |
|                         |                                                                               | P <sub>trend</sub> < 0.0001 | P <sub>trend</sub> < 0.0001 |                                                                               | P <sub>trend</sub> = 0.0014 | P <sub>trend</sub> < 0.0001 |
| <b>- at 35-40 years</b> |                                                                               |                             |                             |                                                                               |                             |                             |
| ≤ 2                     | 270 / 426,578                                                                 | 0.70 [0.61 - 0.82]          | 0.99 [0.85 - 1.16]          | 82 / 12,753                                                                   | 1.02 [0.80 - 1.29]          | 1.08 [0.85 - 1.37]          |
| 3                       | 464 / 507,983                                                                 | 1                           | 1                           | 397 / 64,554                                                                  | 1                           | 1                           |
| 4                       | 196 / 165,379                                                                 | 1.23 [1.04 - 1.45]          | 0.91 [0.77 - 1.08]          | 510 / 85,623                                                                  | 0.98 [0.86 - 1.12]          | 0.92 [0.81 - 1.05]          |
| ≥ 5                     | 49 / 29,007                                                                   | 1.55 [1.15 - 2.08]          | 0.89 [0.66 - 1.20]          | 467 / 53,567                                                                  | 1.35 [1.17 - 1.55]          | 0.95 [0.82 - 1.10]          |
| Missing                 | 35 / 29,029                                                                   | 1.04 [0.73 - 1.47]          | 1.06 [0.75 - 1.51]          | 64 / 6,839                                                                    | 1.3 [0.99 - 1.70]           | 1.11 [0.85 - 1.45]          |
|                         |                                                                               | P <sub>trend</sub> < 0.0001 | P <sub>trend</sub> = 0.2747 |                                                                               | P <sub>trend</sub> = 0.0021 | P <sub>trend</sub> = 0.2414 |

\* Model 2: Includes physical activity (<34 / 34-47 / 47-62 / ≥ 62 MET-h/week), education (≤ 9 / 10-11 / 12-14 / 15-16 / ≥ 17 y), prematurity (no / yes), family history of diabetes (none / only one parent / both parents), smoking (never / former / current smoker, time-dependent variable), high cholesterol level (no / yes), hypertension (no / yes, time-dependent variable), menopausal status (no / yes, time-dependent variable), hormone replacement therapy (never / ever, time-dependent variable), oral contraceptive pills (never / ever), parity and age at 1<sup>st</sup> child (nulliparous / 1<sup>st</sup> child before 30 y, 1-2 children / 1<sup>st</sup> child before 30 y, 3+ children / 1<sup>st</sup> child at 30 y or more), age at menarche (≤ 12 / 13 / ≥ 14 years old), according to birth cohort (1925-1930 / 1930-1935 / 1935-1940 / 1940-1945 / 1945-1950).

† Model 3: Confounders as above and further adjustment for adult BMI as a time-dependent variable
